# Supplementary material for: Assessment of brain reference genes for RT-qPCR studies in neurodegenerative diseases
Source: PubMed Central journal article supplement (PMC5112547; doi:10.1038/srep37116), 2016-11-17
Supplement: srep37116-s1.pdf [file srep37116-s1.pdf]

## Title

Assessment of brain reference genes for RT-qPCR studies in neurodegenerative diseases

## Authors and affiliations

Rasmus Rydbirk<sup>i\*</sup>, Jonas Folke<sup>i</sup>, Kristian Winge<sup>ii,iii</sup>, Susana Aznar<sup>i</sup>, Bente Pakkenberg<sup>i,iv</sup> and Tomasz Brudek<sup>i</sup>

<sup>i</sup>Research Laboratory for Stereology and Neuroscience, Bispebjerg-Frederiksberg Hospital, University Hospital of Copenhagen, Bispebjerg Bakke 23, DK-2400, Copenhagen, Denmark

<sup>ii</sup>Bispebjerg Movement Disorder Biobank, Bispebjerg-Frederiksberg Hospital, University Hospital of Copenhagen, Bispebjerg Bakke 23, DK-2400, Copenhagen, Denmark

<sup>iii</sup>Department of Neurology, Bispebjerg-Frederiksberg Hospital, University Hospital of Copenhagen, Bispebjerg Bakke 23, DK-2400, Copenhagen, Denmark

<sup>iv</sup>Institute of Clinical Medicine, Faculty of Health, University of Copenhagen, Blegdamsvej 3B, DK-2200, Copenhagen, Denmark

\*Correspondence to [rasmus.rydbirk@regionh.dk](mailto:rasmus.rydbirk@regionh.dk)

# Supplementary Figures

## Supplementary Figure 1

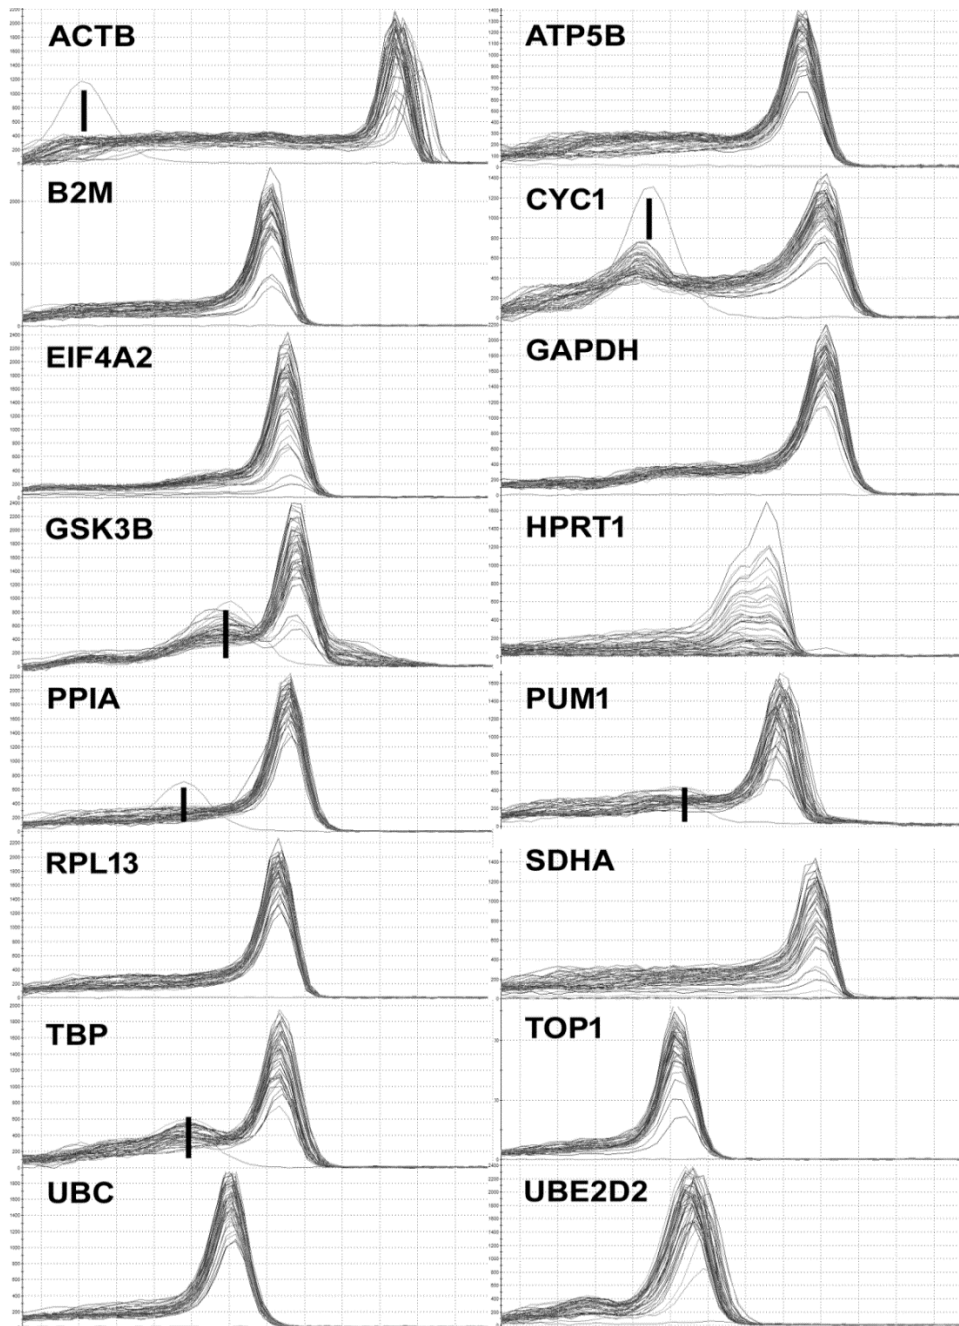

**Figure S1: Melting curves for all analyzed candidate reference genes and the gene of interest, GSK3B. Black bars indicate the presence of primer dimers.**

## Supplementary Figure 2

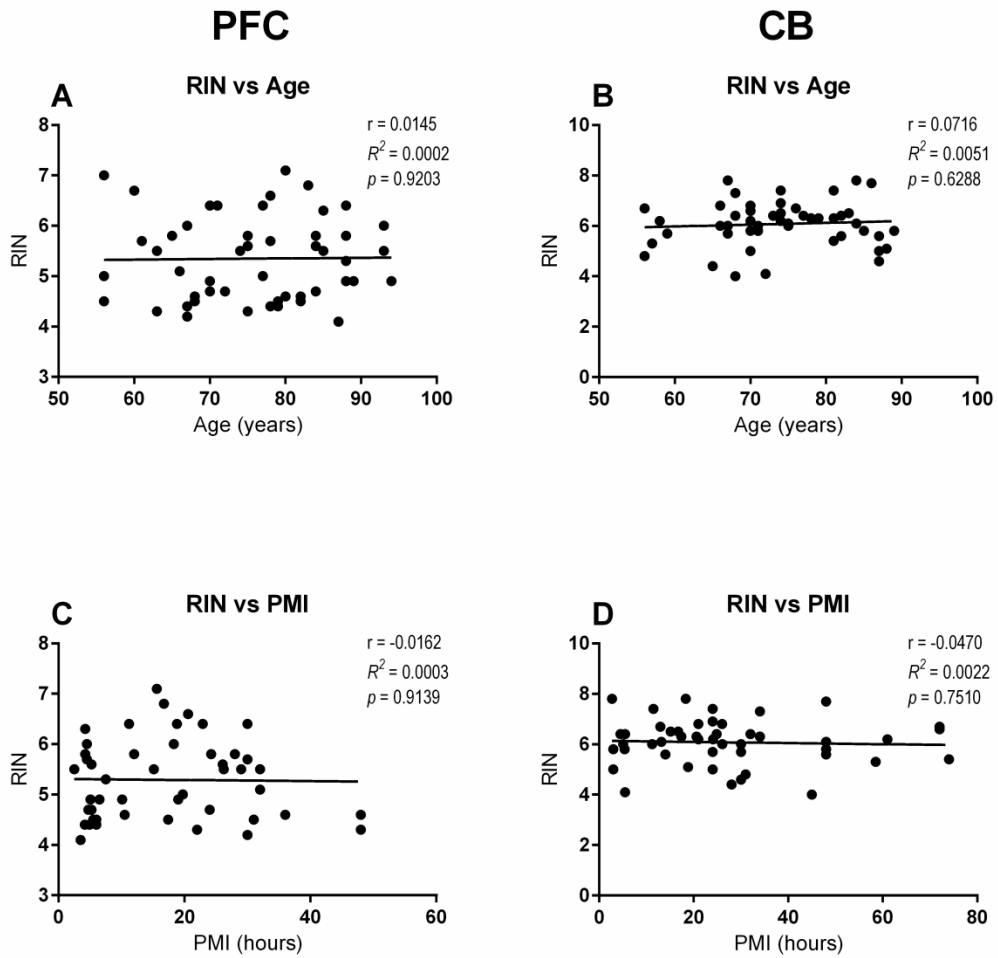

**Figure S2: Correlations between RNA Integrity Number (RIN)-values, and age or post-mortem intervals (PMIs) in the prefrontal cortex (PFC), and the cerebellum (CB).** Data were analyzed using Pearson product-moment correlation.

## Supplementary Tables

### Supplementary Table 1

**Table S1: Demographic data for patient groups – the prefrontal cortex**

| Patient group                  | Origin | Sex | Age (years) | Braak stage | PMI (hours) | RIN |
|--------------------------------|--------|-----|-------------|-------------|-------------|-----|
| Normal, non-demented controls  | NBB    | F   | 68          | 1           | 5.5         | 4.5 |
|                                | NBB    | F   | 68          | 2           | 10.5        | 4.6 |
|                                | NBB    | M   | 70          | 2           | 10.1        | 4.9 |
|                                | NBB    | M   | 88          | 1           | 7.5         | 5.3 |
|                                | NBB    | F   | 93          | 1           | 4.5         | 6.0 |
|                                | NBB    | M   | 85          | 1           | 4.3         | 6.3 |
|                                | NBB    | F   | 84          | 1           | 4.8         | 4.7 |
|                                | NBB    | F   | 89          | 2           | 6.5         | 4.9 |
|                                | NBB    | F   | 77          | 1           | 19.8        | 5.0 |
|                                | NBB    | M   | 88          | 1           | 19.0        | 4.9 |
| Alzheimer's disease            | NBB    | F   | 84          | 5           | 5.3         | 5.6 |
|                                | NBB    | F   | 78          | 5           | 4.5         | 5.7 |
|                                | NBB    | F   | 94          | 4           | 5.1         | 4.9 |
|                                | NBB    | M   | 78          | 5           | 6.0         | 4.4 |
|                                | NBB    | M   | 67          | 5           | 4.2         | 4.4 |
|                                | NBB    | M   | 87          | 6           | 3.5         | 4.1 |
|                                | NBB    | F   | 84          | 4           | 4.3         | 5.8 |
|                                | NBB    | M   | 72          | 5           | 5.3         | 4.7 |
|                                | NBB    | F   | 82          | 4           | 6.0         | 4.5 |
| Parkinson's disease            | NBB    | F   | 93          | 4           | 2.5         | 5.5 |
|                                | HV     | F   | 80          | -           | 15.6        | 7.1 |
|                                | HV     | M   | 74          | -           | 15.2        | 5.5 |
|                                | HV     | F   | 85          | -           | 26.3        | 5.5 |
|                                | HV     | M   | 88          | -           | 18.8        | 6.4 |
|                                | HV     | F   | 79          | -           | 5.0         | 4.4 |
|                                | HV     | M   | 88          | -           | 24.3        | 5.8 |
|                                | HV     | M   | 79          | -           | 17.4        | 4.5 |
|                                | HV     | M   | 77          | -           | 11.2        | 6.4 |
| Multiple System Atrophy        | HV     | M   | 75          | -           | 26.1        | 5.6 |
|                                | HV     | M   | 70          | -           | 22.9        | 6.4 |
|                                | BBH    | F   | 63          | -           | 22.0        | 4.3 |
|                                | BBH    | M   | 60          | -           | 96.0        | 6.7 |
|                                | BBH    | F   | 63          | -           | 29.0        | 5.5 |
|                                | BBH    | F   | 61          | -           | 30.0        | 5.7 |
|                                | BBH    | M   | 66          | -           | 32.0        | 5.1 |
|                                | BBH    | M   | 74          | -           | 32.0        | 5.5 |
|                                | BBH    | F   | 75          | -           | 48.0        | 4.3 |
| Progressive supranuclear palsy | BBH    | M   | 56          | -           | 72.0        | 5.0 |
|                                | BBH    | F   | 56          | -           | 31.0        | 4.5 |
|                                | BBH    | F   | 70          | -           | 24.0        | 4.7 |
|                                | BBH    | F   | 56          | -           | 61.0        | 7.0 |
|                                | BBH    | M   | 65          | -           | 28.0        | 5.8 |
|                                | BBH    | F   | 75          | -           | 12.0        | 5.8 |
|                                | BBH    | M   | 82          | -           | 48.0        | 4.6 |
|                                | BBH    | M   | 67          | -           | 30.0        | 4.2 |
|                                | BBH    | M   | 71          | -           | 30.0        | 6.4 |
| Progressive supranuclear palsy | HV     | M   | 78          | -           | 20.6        | 6.6 |
|                                | HV     | M   | 83          | -           | 16.8        | 6.8 |
|                                | HV     | M   | 67          | -           | 18.3        | 6.0 |
|                                | BBH    | M   | 80          | -           | 36.0        | 4.6 |

Sample origin: NBB: Netherlands Brain Bank, HV: Harvard Brain Bank, BBH: Bispebjerg-Frederiksberg Hospital Brain Bank; M: male; F: female; RIN: RNA integrity number; PMI: post-mortem interval.

## Supplementary Table 2

**Table S2: demographic data for patient groups – cerebellum**

| Patient group                  | Origin | Sex | Age (years) | Braak stage | PMI (hours) | RIN |
|--------------------------------|--------|-----|-------------|-------------|-------------|-----|
| Normal, non-demented controls  | BBH    | M   | 58          | -           | 61.0        | 6.2 |
|                                | BBH    | F   | 70          | -           | 72.0        | 6.6 |
|                                | BBH    | F   | 74          | -           | 21.0        | 6.2 |
|                                | BBH    | F   | 74          | -           | 24.0        | 7.4 |
|                                | BBH    | F   | 81          | -           | 34.0        | 6.3 |
|                                | BBH    | F   | 70          | -           | 21.0        | 6.8 |
|                                | BBH    | M   | 74          | -           | 24.0        | 6.9 |
|                                | BBH    | M   | 86          | -           | 48.0        | 7.7 |
|                                | BBH    | M   | 66          | -           | 26.0        | 6.8 |
|                                | BBH    | F   | 68          | -           | 32.0        | 6.4 |
| Alzheimer's disease            | NBB    | F   | 77          | 5           | 4.5         | 6.4 |
|                                | NBB    | F   | 89          | 5           | 3.0         | 5.8 |
|                                | NBB    | F   | 85          | 6           | 3.0         | 5.8 |
|                                | NBB    | F   | 87          | 5           | 3.0         | 5.0 |
|                                | NBB    | F   | 84          | 5           | 2.8         | 7.8 |
|                                | NBB    | M   | 67          | 6           | 5.1         | 6.0 |
|                                | NBB    | M   | 73          | 4           | 5.5         | 6.4 |
|                                | NBB    | M   | 81          | 5           | 11.5        | 7.4 |
|                                | NBB    | M   | 72          | 4           | 5.5         | 4.1 |
| Parkinson's disease            | NBB    | M   | 71          | 4           | 5.4         | 5.8 |
|                                | HV     | M   | 88          | -           | 18.8        | 5.1 |
|                                | HV     | F   | 87          | -           | 14.0        | 5.6 |
|                                | HV     | M   | 66          | -           | 11.2        | 6.0 |
|                                | HV     | M   | 84          | -           | 13.2        | 6.1 |
|                                | HV     | M   | 70          | -           | 24.1        | 6.2 |
|                                | HV     | F   | 82          | -           | 24.9        | 6.4 |
|                                | HV     | M   | 79          | -           | 17.4        | 6.3 |
|                                | HV     | M   | 75          | -           | 26.1        | 6.0 |
|                                | HV     | M   | 74          | -           | 15.2        | 6.5 |
| Multiple System Atrophy        | HV     | M   | 76          | -           | 13.0        | 6.7 |
|                                | BBH    | F   | 75          | -           | -           | 6.1 |
|                                | BBH    | F   | 59          | -           | 24.0        | 5.7 |
|                                | BBH    | M   | 56          | -           | 72.0        | 6.7 |
|                                | BBH    | F   | 56          | -           | 31.0        | 4.8 |
|                                | BBH    | F   | 70          | -           | 48.0        | 5.8 |
|                                | BBH    | F   | 70          | -           | 24.0        | 5.0 |
|                                | BBH    | M   | 57          | -           | 58.5        | 5.3 |
| Progressive supranuclear palsy | BBH    | F   | 68          | -           | 45.0        | 4.0 |
|                                | BBH    | M   | 65          | -           | 28.0        | 4.4 |
|                                | BBH    | M   | 82          | -           | 48.0        | 5.6 |
|                                | BBH    | F   | 87          | -           | 30.0        | 4.6 |
|                                | BBH    | M   | 81          | -           | 74.0        | 5.4 |
|                                | BBH    | M   | 67          | -           | 30.0        | 5.7 |
|                                | BBH    | M   | 71          | -           | 30.0        | 6.0 |
|                                | BBH    | F   | 68          | -           | 34.0        | 7.3 |
|                                | HV     | M   | 78          | -           | 20.6        | 6.3 |
|                                | HV     | M   | 83          | -           | 16.8        | 6.5 |
| HV                             | M      | 67  | -           | 18.3        | 7.8         |     |

Sample origin: NBB: Netherlands Brain Bank, HV: Harvard Brain Bank, BBH: Bispebjerg-Frederiksberg Hospital Brain Bank; M: male; F: female; RIN: RNA integrity number; PMI: post-mortem interval.

Supplementary Table 3

| Group                    | RIN         |         | Age (years) |         | PMI (hours) |         |
|--------------------------|-------------|---------|-------------|---------|-------------|---------|
|                          | Correlation | p-value | Correlation | p-value | Correlation | p-value |
| <b>Prefrontal cortex</b> |             |         |             |         |             |         |
| NC (Raw Ct-values)       | -0.558      | 0.100*  | -0.761      | 0.011   | -0.199      | 0.583   |
| NC (Normalized)          | -0.261      | 0.467   | 0.338       | 0.339   | 0.234       | 0.515   |
| AD (Raw Ct-values)       | 0.634       | 0.049   | 0.082       | 0.821   | 0.130       | 0.721   |
| AD (Normalized)          | -0.018      | 0.961   | -0.624      | 0.054   | -0.188      | 0.603   |
| PD (Raw Ct-values)       | -0.717      | 0.030   | -0.471      | 0.200   | 0.078       | 0.842   |
| PD (Normalized)          | -0.085      | 0.834*  | 0.627       | 0.071   | 0.158       | 0.685   |
| MSA (Raw Ct-values)      | -0.343      | 0.367   | 0.273       | 0.478   | 0.012       | 0.990*  |
| MSA (Normalized)         | 0.550       | 0.121   | -0.077      | 0.845   | 0.326       | 0.390*  |
| PSP (Raw Ct-values)      | -0.737      | 0.015   | 0.378       | 0.282   | -0.160      | 0.661   |
| PSP (Normalized)         | -0.113      | 0.755   | -0.183      | 0.614   | 0.673       | 0.033   |
| <b>Cerebellum</b>        |             |         |             |         |             |         |
|                          | Correlation | p-value | Correlation | p-value | Correlation | p-value |
| NC (Raw Ct-values)       | -0.254      | 0.474*  | -0.375      | 0.286   | -0.309      | 0.385   |
| NC (Normalized)          | 0.096       | 0.792   | -0.176      | 0.677   | 0.460       | 0.181   |
| AD (Raw Ct-values)       | -0.556      | 0.099*  | -0.251      | 0.485   | 0.358       | 0.307*  |
| AD (Normalized)          | -0.768      | 0.010   | -0.179      | 0.203   | 0.308       | 0.385*  |
| PD (Raw Ct-values)       | -0.344      | 0.331   | 0.223       | 0.535   | 0.376       | 0.284   |
| PD (Normalized)          | 0.535       | 0.115*  | -0.515      | 0.887   | -0.172      | 0.635   |
| MSA (Raw Ct-values)      | -0.538      | 0.169   | -0.075      | 0.860   | -0.603      | 0.152   |
| MSA (Normalized)         | -0.059      | 0.890*  | -0.193      | 0.582   | 0.507       | 0.246   |
| PSP (Raw Ct-values)      | 0.036       | 0.933   | 0.382       | 0.351   | 0.073       | 0.887*  |
| PSP (Normalized)         | -0.731      | 0.039   | 0.450       | 0.033   | 0.561       | 0.163*  |

**Table S3: Correlation analyses of the different patient groups and different experimental conditions.** Correlations were performed for the RNA integrity number (RIN), age, and post-mortem intervals (PMIs) based on raw Ct-values from the reverse transcriptase quantitative real-time PCR and normalized to the most stable reference genes in the specific group. NC: Normal controls, AD: Alzheimer's disease; PD: Parkinson's disease; MSA: Multiple System Atrophy; PSP: Progressive Supranuclear Palsy. Bonferroni correction was used on Pearson product-moment or Spearman rank correlation (\*) with *p*-values below 0.0025 considered significant.
